# Supplementary material for: Insights into the performance and degradation of Ru@Pt core–shell catalysts for fuel cells by advanced (scanning) transmission electron microscopy
Source: Royal Society of Chemistry journal article supplement (doi:10.1039/d2nr04869h), 2022-01-01
Supplement: d2nr04869h1.pdf [file d2nr04869h1.pdf]

Supplementary Information for:

# Insights into the performance and degradation of Ru@Pt core-shell catalysts for fuel cells by advanced (scanning) transmission electron microscopy

Alba Garzón Manjón<sup>\*,a,†</sup>, Miquel Vega-Paredes<sup>a,†</sup>, Viktoriya Berova<sup>b</sup>, Thomas Gänslar<sup>a</sup>, Torsten Schwarz<sup>a</sup>, Nicolas A. Rivas Rivas<sup>a</sup>, Katharina Hengge<sup>b</sup>, Tilman Jurzinsky<sup>b</sup>, Christina Scheu<sup>\*,a</sup>

<sup>a</sup> Max-Planck-Institut für Eisenforschung GmbH, Max-Planck-Straße 1, 40237 Düsseldorf, Germany.

<sup>b</sup> Freudenberg Fuel Cell e-Power Systems GmbH, Bayerwaldstraße 3, 81737 München, Germany.

<sup>†</sup>Equal contribution

\*Corresponding authors: [a.garzon@mpie.de](mailto:a.garzon@mpie.de)

[scheu@mpie.de](mailto:scheu@mpie.de)

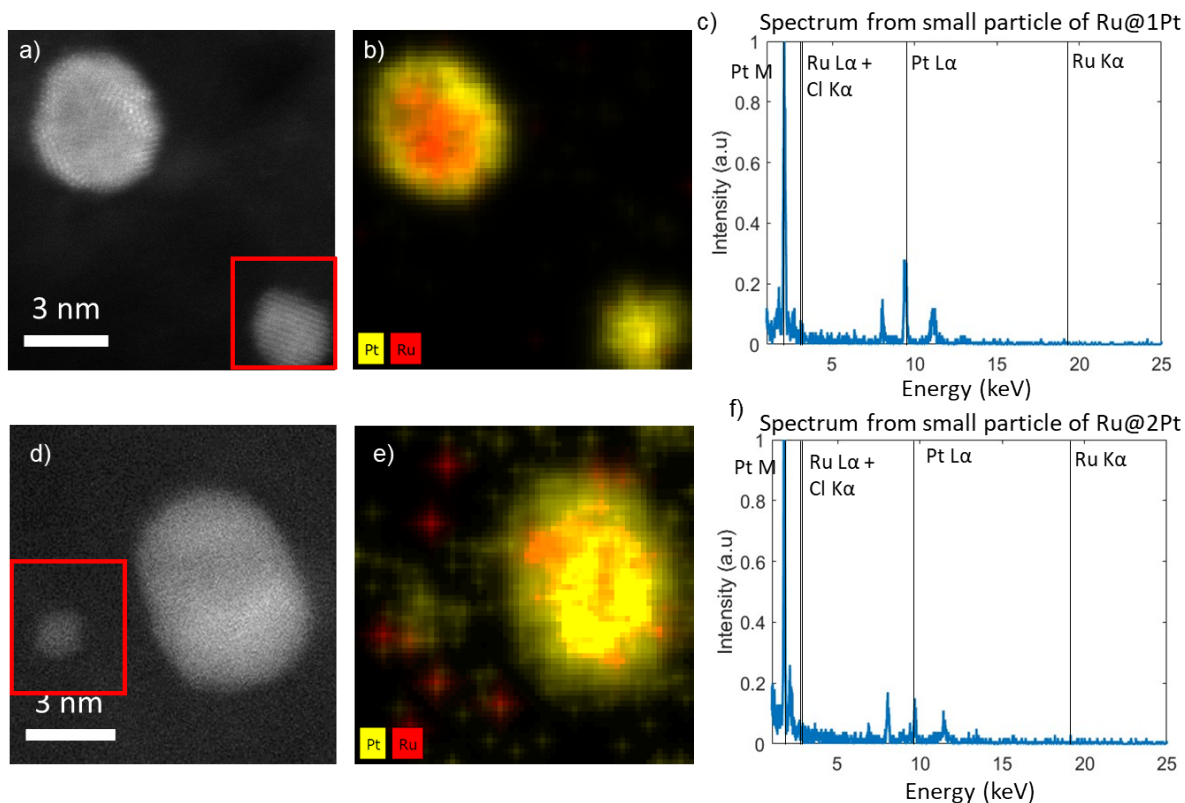

*FS1. EDS spectra of the small particles present in Ru@1Pt (a) and Ru@2Pt (f), extracted from the region indicated from a red square in HAADF micrograph (a,d). The corresponding EDS composition maps are also shown in (b,e). In the EDS spectra lines indicating the characteristic X-rays energies of Pt (M=2.048 keV, L $\alpha$  = 9.44 keV) and Ru (L $\alpha$ =2.558 keV, K $\alpha$  =19.23 keV) are shown. Notice how for both samples only Pt signal is detected, and no significant Ru signal is detectable above the background noise.*

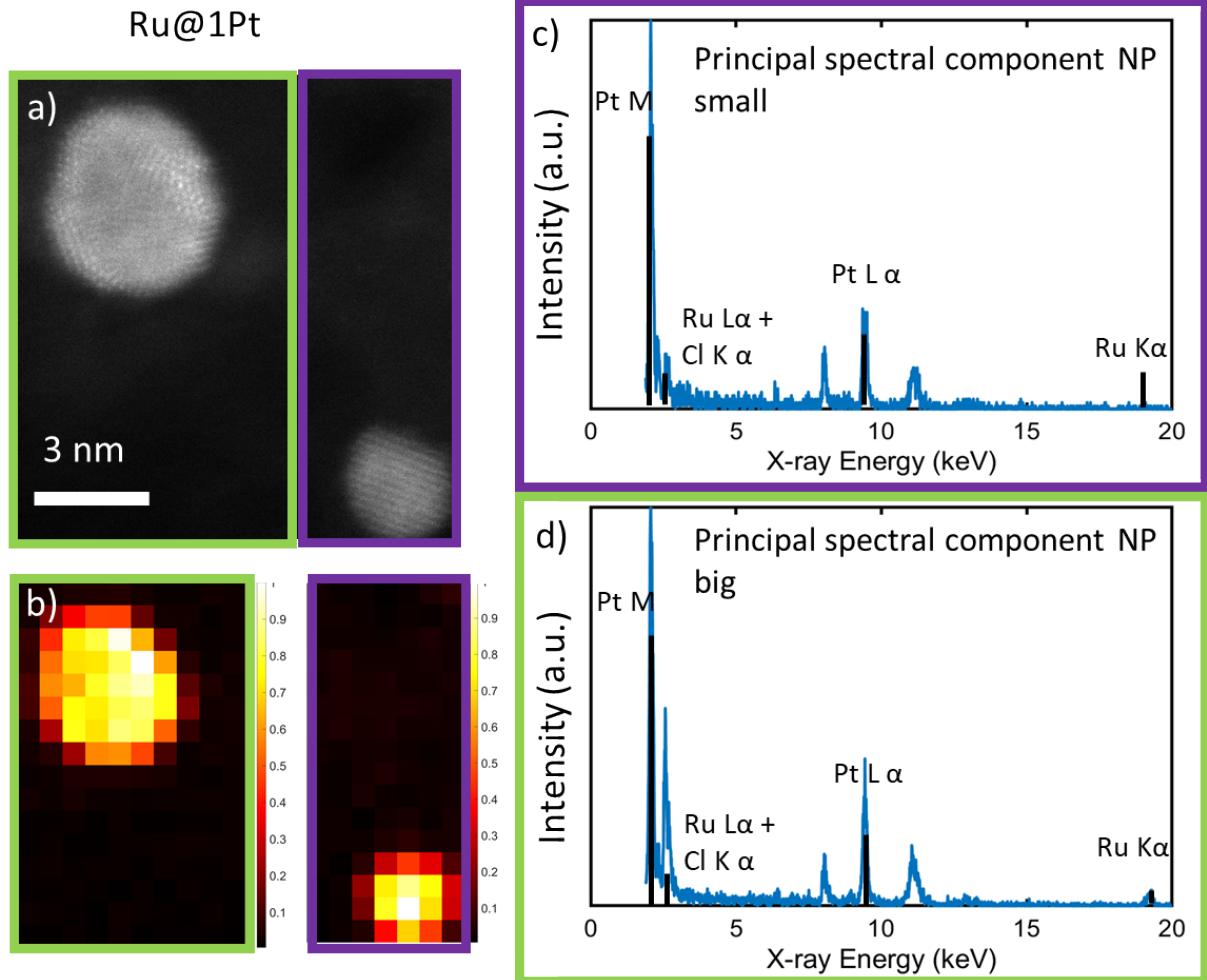

FS2. PCA from the EDS hypermaps of Ru@1Pt. Due to the low EDS signal of the small, pure Pt NP the principal components of each NP had to be extracted separately. a) Corresponding HAADF-STEM micrograph. In b) the weight of the principal spectral components for the small NP (c) and core-shell NP (d) is shown.

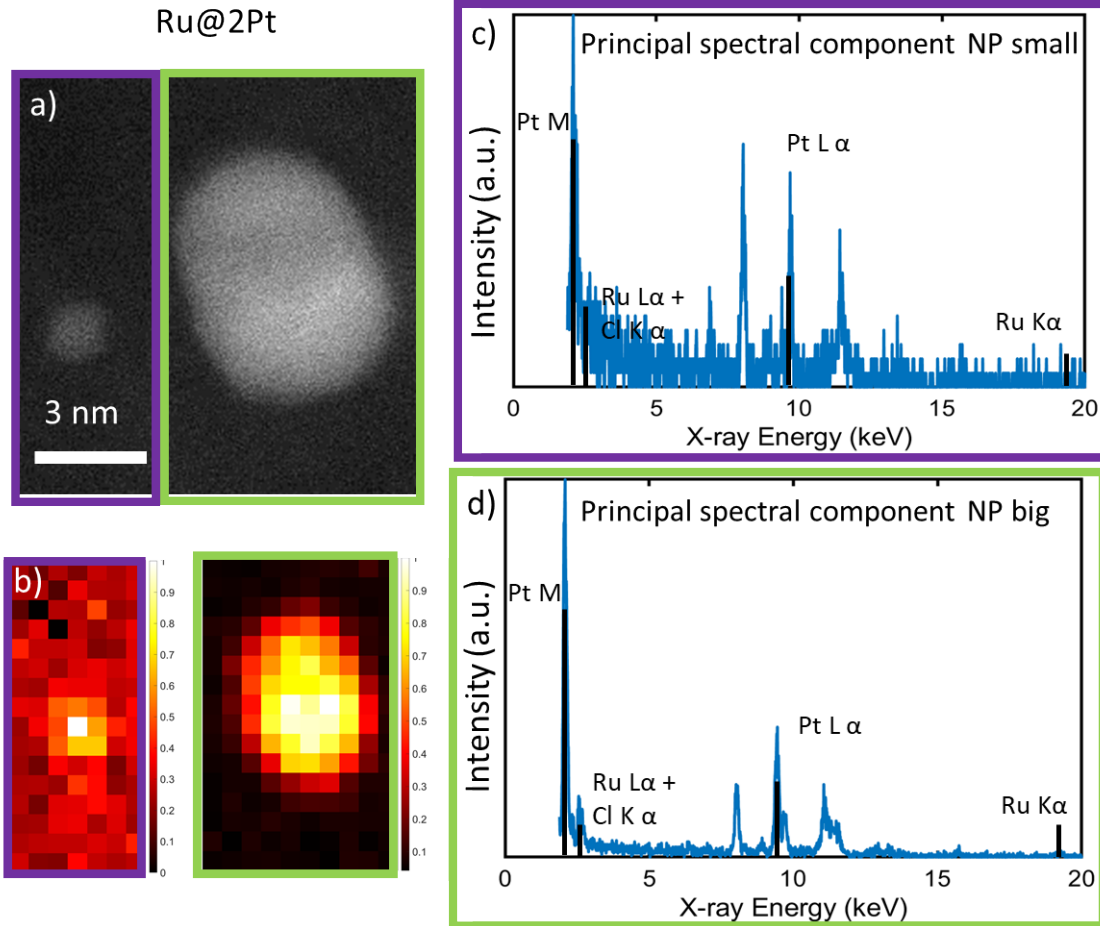

FS3. PCA from the EDS hypermaps of Ru@2Pt. Due to the low EDS signal of the small, pure Pt NP the principal components of each NP had to be extracted separately. a) Corresponding HAADF-STEM micrograph. In b) the weight of the principal spectral components for the small NP (c) and core-shell NP (d) is shown.

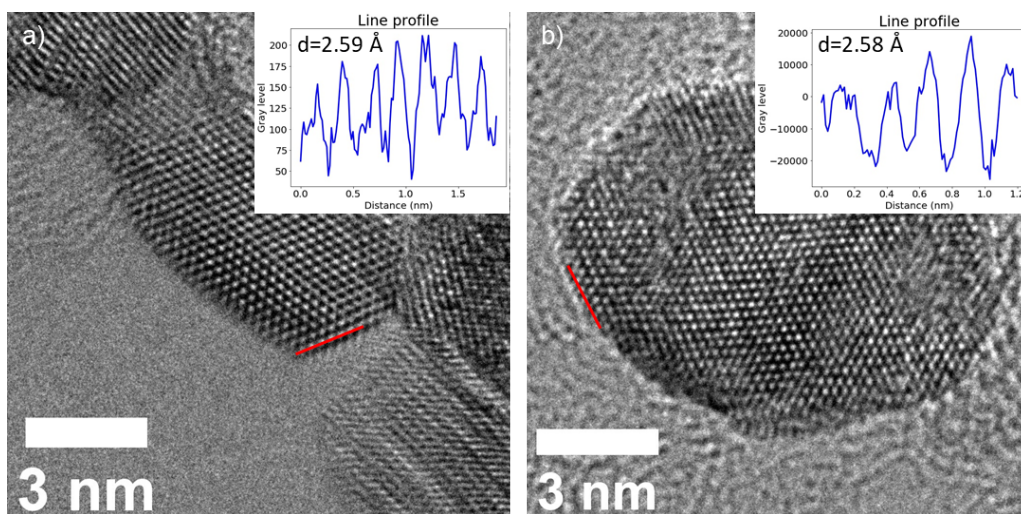

FS4. HR-TEM micrographs of Ru@1Pt (a) and Ru@2Pt (b). As insets, the intensity profiles along the shell, showing similar interatomic distances for both samples.

Ru@1Pt

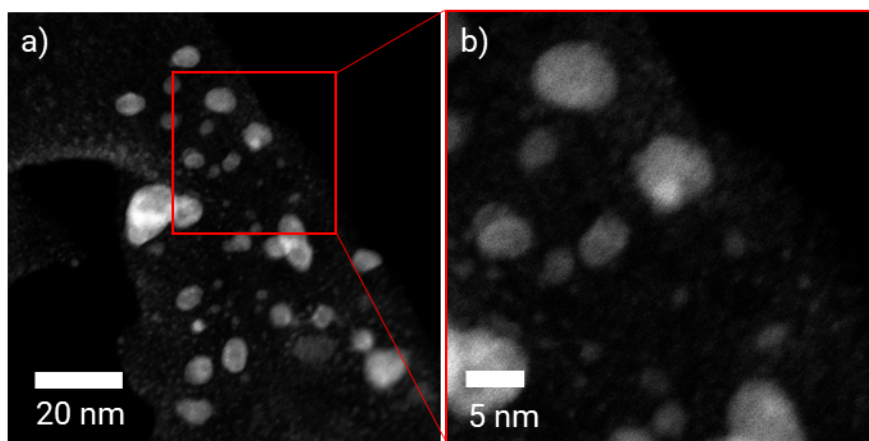

Ru@2Pt

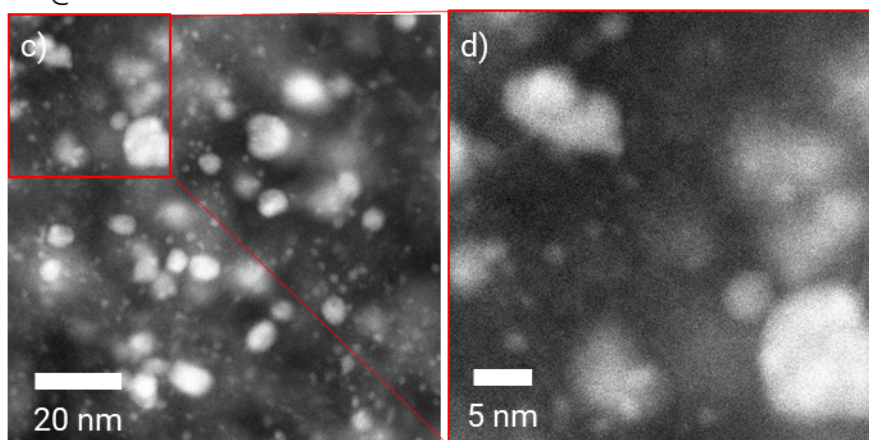

FS5. HAADF-STEM micrographs (a,c) and corresponding digital zoom in (b,d) showing the <1 nm atom clusters present in the anode of the MEAs after cycling.

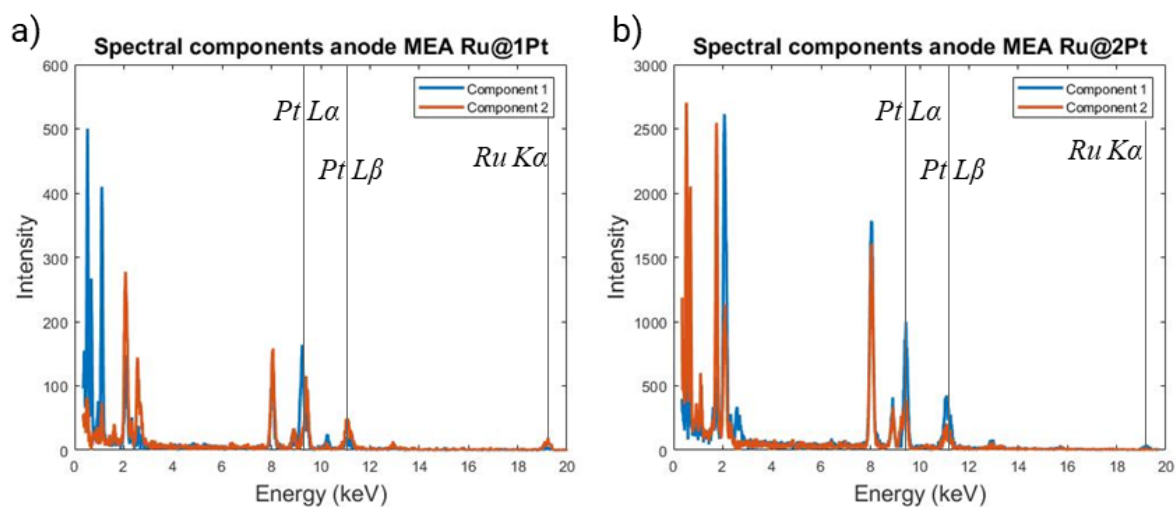

FS6. Two main spectral components for the anode of the MEA containing Ru@1Pt (a) and Ru@2Pt (b). The vertical lines indicate the characteristic X-rays energies of Pt ( $L\alpha = 9.44$  keV,  $L\beta = 11.07$  keV) and Ru  $K\alpha$  (19.23 keV).
